# Supplementary material for: Sources and fate of terrestrial dissolved organic carbon in lakes of a Boreal Plains region recently affected by wildfire
Source: Copernicus journal article supplement (doi:10.5194/bg-10-6247-2013), 2013-10-02
Supplement: Supplementary file 1 [file bg-10-6247-2013-supplement.pdf]

| Lake and well characteristics |                               |            |            |                               |                                  |                                  | Water Chemistry and DOC characteristics |                  |                    |                    |                    |                |                     |                     |                  |                  |                  | Incubation results |                   |                   |                    |                                    |                                    |                 | Mixing model results |                                  |                                  |                        |                         |                         |                          |                           |                           |                           |                            |                            |         |
|-------------------------------|-------------------------------|------------|------------|-------------------------------|----------------------------------|----------------------------------|-----------------------------------------|------------------|--------------------|--------------------|--------------------|----------------|---------------------|---------------------|------------------|------------------|------------------|--------------------|-------------------|-------------------|--------------------|------------------------------------|------------------------------------|-----------------|----------------------|----------------------------------|----------------------------------|------------------------|-------------------------|-------------------------|--------------------------|---------------------------|---------------------------|---------------------------|----------------------------|----------------------------|---------|
| Lake ID                       | Size (ha)                     | Depth (m)  | Long (deg) | Lat (deg)                     | Located within fire perimeter    | Fine- or coarse-textured setting | Ec (µS cm-1)                            | pH               | δD (per mil)       | δ18O (per mil)     | Total N (mg N L-1) | DOC (mg C L-1) | A254 (cm-1)         | SUVA (L mg C-1 m-1) | CC (RU mg C-1 L) | CA (RU mg C-1 L) | CX (RU mg C-1 L) | CM (RU mg C-1 L)   | CT (RU mg C-1 L)  | Dark DOC loss (%) | Dark CO2 loss (%)  | Dark A254 loss (%)                 | Dark Change in SUVA (L mg C-1 m-1) | UV DOC loss (%) | UV CO2 loss (%)      | UV A254 loss (%)                 | UV Change in SUVA (L mg C-1 m-1) | fP (unitless)          | fP 95% CI Low boundary  | fP 95% CI High boundary | DOCA (%)                 | DOCA 95% CI Low boundary  | DOCA 95% CI High boundary | A254Δ (%)                 | A254Δ 95% CI Low boundary  | A254Δ 95% CI High boundary |         |
| L303                          | 254                           | 1.5        | 115.118    | 55.819                        | No                               | Fine                             | 208.3                                   | 8.47             | -93.06             | -8.42              | 1.65               | 46.22          | 0.769               | 1.66                | 0.048            | 0.049            | 0.028            | 0.036              | 0.019             | 1.05              | 0.68               | -2.69                              | -0.06                              | 1.18            | 2.67                 | 11.75                            | -0.17                            | 0.85                   | 0.72                    | 0.90                    | 45                       | 18                        | 51                        | 71                        | 59                         | 74                         |         |
| L300                          | 13                            | 1.2        | 115.122    | 55.871                        | No                               | Fine                             | 152.5                                   | 7.65             | -92.75             | -8.65              | 1.64               | 54.45          | 1.253               | 2.30                | 0.075            | 0.076            | 0.049            | 0.044              | 0.014             | 3.00              | 0.42               | -0.94                              | -0.09                              | 6.27            | 3.26                 | 15.38                            | -0.21                            | 0.91                   | 0.83                    | 0.95                    | 46                       | 18                        | 51                        | 60                        | 42                         | 63                         |         |
| L301                          | 21                            | 3.0        | 115.132    | 55.829                        | No                               | Fine                             | 55.3                                    | 6.72             | -100.77            | -9.43              | 0.97               | 34.47          | 0.9                 | 2.61                | 0.102            | 0.066            | 0.064            | 0.048              | 0.012             | -3.19             | 0.89               | -1.41                              | 0.05                               | 5.41            | 5.33                 | 19.13                            | -0.40                            | 1.00                   | 0.98                    | 1.03                    | 65                       | 54                        | 72                        | 71                        | 62                         | 75                         |         |
| L39                           | 3.5                           | 2.5        | 115.483    | 56.062                        | No                               | Fine                             | 133.0                                   | 9.93             | -98.8              | -8.1               | 1.35               | 24.49          | 0.412               | 1.68                | 0.051            | 0.040            | 0.029            | 0.039              | 0.024             | -5.92             | 0.74               | -0.60                              | 0.09                               | -1.51           | 1.32                 | 18.43                            | -0.33                            | 0.92                   | 0.86                    | 0.95                    | 71                       | 62                        | 77                        | 85                        | 80                         | 87                         |         |
| L40                           | 0.5                           | 1.0        | 115.477    | 56.074                        | No                               | Fine                             | 133.1                                   | 7.31             | -106.46            | -9.53              | 1.60               | 49.60          | 1.11                | 2.24                | 0.075            | 0.068            | 0.046            | 0.044              | 0.015             | 0.34              | 0.60               | -0.22                              | -0.01                              | 6.24            | 3.94                 | 17.65                            | -0.28                            | 0.93                   | 0.87                    | 0.97                    | 52                       | 28                        | 57                        | 63                        | 48                         | 66                         |         |
| L42                           | 1.5                           | 2.3        | 115.477    | 56.060                        | No                               | Fine                             | 36.1                                    | 7.14             | -100.91            | -7.61              | 1.36               | 23.68          | 0.557               | 2.35                | 0.078            | 0.049            | 0.051            | 0.046              | 0.018             | 1.35              | 1.34               | -0.90                              | -0.05                              | 4.85            | 5.09                 | 18.09                            | -0.32                            | 1.02                   | 1.00                    | 1.05                    | 75                       | 68                        | 80                        | 82                        | 77                         | 85                         |         |
| L43                           | 0.6                           | 0.8        | 115.470    | 56.077                        | No                               | Fine                             | 62.0                                    | 7.20             | -93.13             | -7.53              | 1.74               | 34.98          | 0.807               | 2.31                | No Data          | No Data          | No Data          | No Data            | No Data           | No Data           | No Data            | No Data                            | No Data                            | No Data         | No Data              | No Data                          | No Data                          | No Data                | No Data                 | No Data                 | No Data                  | No Data                   | No Data                   | No Data                   | No Data                    | No Data                    | No Data |
| L48                           | 2.3                           | 0.9        | 115.468    | 56.072                        | No                               | Fine                             | 53.7                                    | 6.86             | -96.11             | -7.64              | 1.63               | 29.69          | 0.703               | 2.37                | 0.081            | 0.044            | 0.050            | 0.048              | 0.018             | 2.55              | 1.28               | -1.93                              | -0.10                              | 6.44            | 5.00                 | 18.05                            | -0.28                            | 1.01                   | 0.98                    | 1.04                    | 70                       | 58                        | 75                        | 79                        | 71                         | 81                         |         |
| L19                           | 0.8                           | 2.0        | 115.538    | 56.083                        | No                               | Fine                             | 56.2                                    | 7.22             | -100.71            | -8.26              | 1.15               | 19.21          | 0.474               | 2.47                | 0.093            | 0.047            | 0.058            | 0.055              | 0.025             | 5.94              | 0.37               | 2.82                               | -0.08                              | 5.58            | 4.01                 | No Data                          | No Data                          | 1.00                   | 0.98                    | 1.03                    | 79                       | 75                        | 85                        | 85                        | 80                         | 87                         |         |
| L27                           | 4.9                           | 1.0        | 115.519    | 56.068                        | No                               | Fine                             | 76.7                                    | 6.80             | -96.48             | -8.75              | 2.60               | 51.67          | 1.12                | 2.17                | 0.086            | 0.047            | 0.050            | 0.045              | 0.020             | 2.20              | 1.39               | 0.46                               | -0.04                              | 7.53            | 5.67                 | 18.29                            | -0.24                            | 0.99                   | 0.95                    | 1.01                    | 51                       | 25                        | 54                        | 66                        | 53                         | 69                         |         |
| L171                          | 10                            | 1.0        | 115.193    | 55.983                        | Yes                              | Fine                             | 131.4                                   | 7.56             | -102.94            | -10.3              | 1.81               | 48.97          | 1.203               | 2.46                | 0.085            | 0.068            | 0.055            | 0.049              | 0.014             | -5.77             | 1.26               | -2.07                              | 0.08                               | 2.59            | 4.65                 | 18.64                            | -0.39                            | 0.93                   | 0.86                    | 0.97                    | 52                       | 28                        | 57                        | 61                        | 46                         | 65                         |         |
| L168                          | 13                            | 1.6        | 115.204    | 55.985                        | Yes                              | Fine                             | 190.5                                   | 9.74             | -107.85            | -10.22             | 1.86               | 52.46          | 1.191               | 2.27                | 0.066            | 0.061            | 0.037            | 0.045              | 0.016             | -0.18             | 1.26               | -1.47                              | -0.03                              | 6.59            | 3.78                 | 19.63                            | -0.31                            | 0.87                   | 0.76                    | 0.92                    | 44                       | 16                        | 50                        | 57                        | 40                         | 62                         |         |
| L169                          | 330                           | 1.7        | 115.191    | 55.968                        | Yes                              | Fine                             | 244.0                                   | 8.50             | -91.5              | -7.84              | 4.39               | 58.71          | 0.999               | 1.70                | 0.062            | 0.045            | 0.034            | 0.045              | 0.019             | -2.89             | No Data            | -1.49                              | 0.02                               | 0.48            | 4.04                 | 13.13                            | -0.22                            | 0.82                   | 0.66                    | 0.88                    | 36                       | 3                         | 42                        | 61                        | 43                         | 66                         |         |
| L205                          | 21                            | 1.3        | 115.154    | 55.964                        | Yes                              | Fine                             | 99.4                                    | 7.53             | -111.45            | -11.18             | 1.75               | 44.22          | 1.272               | 2.88                | 0.110            | 0.078            | 0.070            | 0.054              | 0.010             | 0.73              | 1.90               | -0.69                              | -0.04                              | 11.33           | 5.65                 | 21.97                            | -0.35                            | 0.96                   | 0.92                    | 0.99                    | 57                       | 39                        | 63                        | 60                        | 45                         | 64                         |         |
| L162                          | 93                            | 2.0        | 115.301    | 55.975                        | Yes                              | Fine                             | 354.3                                   | 8.14             | -97.36             | -9.03              | 1.94               | 46.40          | 0.694               | 1.50                | 0.046            | 0.031            | 0.024            | 0.031              | 0.020             | 4.17              | 1.42               | -3.05                              | -0.10                              | 2.94            | 2.55                 | 12.80                            | -0.13                            | 0.70                   | 0.47                    | 0.80                    | 33                       | -12                       | 41                        | 68                        | 48                         | 73                         |         |
| L121                          | 8.5                           | 1.5        | 115.342    | 56.010                        | Yes                              | Fine                             | 125.7                                   | 8.55             | -102.43            | -9.49              | 1.45               | 46.10          | 1.027               | 2.23                | 0.067            | 0.063            | 0.043            | 0.042              | 0.015             | -0.91             | 1.12               | -0.78                              | 0.00                               | 2.16            | 3.36                 | 15.85                            | -0.29                            | 0.93                   | 0.88                    | 0.96                    | 50                       | 29                        | 57                        | 65                        | 52                         | 69                         |         |
| L122                          | 9.1                           | 1.6        | 115.348    | 56.005                        | Yes                              | Fine                             | 181.9                                   | 7.96             | -94.51             | -7.95              | 1.95               | 46.18          | 0.76                | 1.65                | 0.053            | 0.046            | 0.032            | 0.037              | 0.015             | -3.43             | 0.56               | -0.98                              | 0.04                               | -2.15           | 3.19                 | 14.46                            | -0.27                            | 0.88                   | 0.78                    | 0.92                    | 51                       | 29                        | 58                        | 73                        | 62                         | 76                         |         |
| L118                          | 5.7                           | 1.6        | 115.382    | 56.019                        | Yes                              | Fine                             | 72.8                                    | 7.91             | -102.62            | -9.21              | 1.44               | 40.29          | 0.913               | 2.27                | 0.069            | 0.051            | 0.041            | 0.040              | 0.015             | -0.43             | 1.34               | -2.70                              | -0.04                              | 5.01            | 4.58                 | 14.63                            | -0.20                            | 0.99                   | 0.96                    | 1.00                    | 55                       | 36                        | 61                        | 71                        | 61                         | 75                         |         |
| L111                          | 4.9                           | 2.0        | 115.423    | 56.027                        | Yes                              | Fine                             | 237.9                                   | 8.89             | -100.98            | -8.61              | 1.79               | 35.58          | 0.668               | 1.88                | 0.060            | 0.048            | 0.035            | 0.040              | 0.019             | -0.05             | 0.78               | 0.55                               | 0.01                               | 2.70            | 4.65                 | 18.78                            | -0.30                            | 0.82                   | 0.66                    | 0.87                    | 57                       | 39                        | 64                        | 74                        | 63                         | 78                         |         |
| L112                          | 4.5                           | 1.6        | 115.430    | 56.012                        | Yes                              | Fine                             | 182.9                                   | 9.70             | -120.24            | -12.98             | 1.51               | 49.17          | 1.342               | 2.73                | 0.098            | 0.070            | 0.058            | 0.059              | 0.015             | -2.17             | 0.44               | 0.69                               | 0.08                               | 6.69            | 3.91                 | 25.48                            | -0.54                            | 0.88                   | 0.78                    | 0.92                    | 50                       | 28                        | 57                        | 55                        | 36                         | 60                         |         |
| L59                           | 28                            | 1.3        | 115.377    | 56.072                        | Yes                              | Fine                             | 103.2                                   | No Data          | -96.44             | -8.59              | 1.61               | 36.28          | 0.714               | 1.97                | No Data          | No Data          | No Data          | No Data            | No Data           | No Data           | No Data            | No Data                            | No Data                            | No Data         | No Data              | No Data                          | No Data                          | No Data                | No Data                 | No Data                 | No Data                  | No Data                   | No Data                   | No Data                   | No Data                    | No Data                    | No Data |
| L1                            | 4.9                           | 2.5        | 115.617    | 56.108                        | No                               | Coarse                           | 113.3                                   | 8.68             | -110.91            | -10.9              | 0.66               | 12.14          | 0.168               | 1.38                | 0.039            | 0.038            | 0.024            | 0.028              | 0.026             | -1.73             | No Data            | 3.93                               | 0.08                               | -5.42           | 5.02                 | 15.17                            | -0.28                            | 0.63                   | 0.46                    | 0.76                    | 79                       | 72                        | 84                        | 90                        | 85                         | 92                         |         |
| L2                            | 219                           | 4.1        | 115.603    | 56.096                        | No                               | Coarse                           | 195.5                                   | 8.38             | -101.95            | -9.35              | 0.74               | 17.11          | 0.22                | 1.29                | 0.032            | 0.031            | 0.018            | 0.026              | 0.017             | -4.13             | No Data            | 0.00                               | 0.04                               | -0.64           | 2.26                 | 10.88                            | -0.12                            | 0.06                   | -0.30                   | 0.27                    | No Data                  | No Data                   | No Data                   | No Data                   | No Data                    | No Data                    |         |
| L7                            | 2.0                           | 1.8        | 115.582    | 56.087                        | No                               | Coarse                           | 88.3                                    | 7.34             | -96.94             | -7.48              | 1.51               | 26.02          | 0.578               | 2.22                | 0.089            | 0.060            | 0.053            | 0.058              | 0.022             | -3.92             | 0.89               | 0.72                               | 0.10                               | 1.47            | 3.83                 | 20.57                            | -0.44                            | 0.54                   | 0.66                    | 0.95                    | 66                       | 54                        | 74                        | 76                        | 65                         | 80                         |         |
| L11                           | 0.3                           | 1.5        | 115.558    | 56.084                        | No                               | Coarse                           | 90.9                                    | 7.43             | -100.68            | -7.51              | 1.23               | 31.78          | 0.698               | 2.20                | 0.077            | 0.060            | 0.051            | 0.047              | 0.016             | 1.80              | 0.31               | 0.22                               | -0.04                              | 4.26            | 3.74                 | 19.38                            | -0.35                            | 0.80                   | 0.65                    | 0.94                    | 63                       | 48                        | 70                        | 73                        | 61                         | 77                         |         |
| L15                           | 0.9                           | 0.5        | 115.569    | 56.086                        | No                               | Coarse                           | 27.9                                    | 5.53             | -109.23            | -11.24             | 2.52               | 52.93          | 1.431               | 2.70                | 0.106            | 0.050            | 0.069            | 0.046              | 0.012             | 1.08              | 0.59               | 0.12                               | -0.03                              | 6.15            | 4.70                 | 16.06                            | -0.30                            | No Data                | No Data                 | No Data                 | No Data                  | No Data                   | No Data                   | No Data                   | No Data                    | No Data                    |         |
| L17                           | 107                           | 5.5        | 115.548    | 56.093                        | No                               | Coarse                           | 124.5                                   | 9.06             | -91.31             | -6.85              | 1.14               | 22.21          | 0.216               | 0.97                | 0.018            | 0.015            | 0.009            | 0.014              | 0.020             | 1.63              | 0.54               | 1.23                               | 0.00                               | 1.05            | 1.44                 | 9.82                             | -0.08                            | 0.54                   | 0.35                    | 0.67                    | 59                       | 40                        | 69                        | 87                        | 80                         | 90                         |         |
| L5                            | 298                           | 3.3        | 115.567    | 56.116                        | Yes                              | Coarse                           | 134.0                                   | 8.76             | -109.99            | -10.77             | 0.65               | 17.56          | 0.264               | 1.50                | 0.040            | 0.039            | 0.023            | 0.030              | 0.020             | 2.49              | 2.14               | 0.37                               | -0.03                              | 3.14            | 5.47                 | 12.09                            | -0.13                            | 0.48                   | 0.27                    | 0.63                    | 63                       | 49                        | 75                        | 82                        | 69                         | 87                         |         |
| L16                           | 29                            | 2.0        | 115.511    | 56.108                        | Yes                              | Coarse                           | 120.7                                   | 8.25             | -90.89             | -7.69              | 1.27               | 23.09          | 0.307               | 1.33                | 0.034            | 0.018            | 0.016            | 0.025              | 0.023             | 0.89              | 1.23               | 4.39                               | 0.04                               | -1.11           | 3.37                 | 16.23                            | -0.22                            | 0.59                   | 0.40                    | 0.73                    | 62                       | 43                        | 70                        | 83                        | 73                         | 86                         |         |
| L201                          | 38                            | 2.8        | 115.709    | 56.121                        | Yes                              | Coarse                           | 163.5                                   | 8.16             | -100.11            | -8.9               | 1.08               | 20.26          | 0.275               | 1.36                | 0.038            | 0.031            | 0.024            | 0.027              | 0.019             | -2.22             | 0.77               | 0.42                               | 0.03                               | 1.45            | 2.51                 | 19.33                            | -0.24                            | 0.29                   | 0.01                    | 0.47                    | 50                       | -11                       | 63                        | 70                        | 8                          | 82                         |         |
| L206                          | 13                            | 3.0        | 115.703    | 56.130                        | Yes                              | Coarse                           | 143.5                                   | 7.79             | -102.96            | -8.67              | 1.03               | 23.06          | 0.36                | 1.56                | 0.044            | 0.039            | 0.024            | 0.032              | 0.022             | -1.68             | No Data            | 0.00                               | 0.02                               | -0.93           | 1.84                 | 12.77                            | -0.19                            | 0.42                   | 0.18                    | 0.58                    | 52                       | 13                        | 64                        | 73                        | 46                         | 80                         |         |
| L208                          | 2.8                           | 1.5        | 115.707    | 56.115                        | Yes                              | Coarse                           | 66.9                                    | 8.55             | -102.06            | -9.39              | 1.28               | 22.87          | 0.405               | 1.77                | 0.053            | 0.043            | 0.032            | 0.037              | 0.023             | -1.31             | 1.20               | -1.16                              | 0.00                               | 2.66            | 3.96                 | 16.81                            | -0.25                            | 0.95                   | 0.81                    | 1.11                    | 74                       | 66                        | 80                        | 86                        | 81                         | 87                         |         |
| Well ID                       | Peatland or mineral soil well | Long (deg) | Lat (deg)  | Located within fire perimeter | Fine- or coarse-textured setting | Ec (µS cm-1)                     | pH                                      | deltaD (per mil) | delta18O (per mil) | Total N (mg N L-1) | DOC (mg C L-1)     | A254 (cm-1)    | SUVA (L mg C-1 m-1) | CC (RU mg C-1 L)    | CA (RU mg C-1 L) | CX (RU mg C-1 L) | CM (RU mg C-1 L) | CT (RU mg C-1 L)   | Dark DOC loss (%) | Dark CO2 loss (%) | Dark A254 loss (%) | Dark Change in SUVA (L mg C-1 m-1) | UV DOC loss (%)                    | UV CO2 loss (%) | UV A254 loss (%)     | UV Change in SUVA (L mg C-1 m-1) | fP (unitless)                    | fP 95% CI Low boundary | fP 95% CI High boundary | DOCA (%)                | DOCA 95% CI Low boundary | DOCA 95% CI High boundary | A254Δ (%)                 | A254Δ 95% CI Low boundary | A254Δ 95% CI High boundary |                            |         |
| L43-65                        | Mineral soil                  | 115.477    | 56.074     | No                            | Fine                             | 2135.0                           | 7.33                                    | -152.68          | -18.98             | 1.21               | 21.06              | 0.1            | 0.47                | 0.035               | 0.026            | 0.015            | 0.037            | 0.023              | 7.77              | No Data           | -4.05              | -0.05                              | 6.75                               | No Data         | 12.16                | -0.02                            | N/a                              | N/a                    | N/a                     | N/a                     | N/a                      | N/a                       | N/a                       | N/a                       | N/a                        | N/a                        |         |
| L300-6                        | Mineral soil                  | 115.124    | 55.873     | No                            | Fine                             | 572.0                            | 7.35                                    | -146.88          | -18.32             | 6.52               | 36.49              | 0.239          | 0.66                | 0.047               | 0.022            | 0.024            | 0.032            | 0.017              | 2.52              | No Data           | -4.04              | -0.04                              | -0.72                              | No Data         | 13.97                | -0.08                            | N/a                              | N/a                    | N/a                     | N/a                     | N/a                      | N/a                       | N/a                       | N/a                       | N/a                        | N/a                        |         |
| L16-01P8-15                   | Mineral soil                  | 115.544    | 56.104     | No                            | Coarse                           | 421.0                            | 7.83                                    | -155.68          | -19.27             | 0.38               | 13.62              | 0.123          | 0.90                | 0.066               | 0.026            | 0.031            | 0.043            | 0.030              | 10.89             | No Data           | -2.40              | -0.10                              | 5.21                               | No Data         | 16.00                | -0.08                            | N/a                              | N/a                    | N/a                     |                         |                          |                           |                           |                           |                            |                            |         |
